# Supplementary material for: Development and Validation of Ferroptosis- and Immune-Related lncRNAs Signatures for Breast Infiltrating Duct and Lobular Carcinoma
Source: PubMed Central journal article supplement (PMC9015165; doi:10.3389/fonc.2022.844642), 2022-04-04
Supplement: DataSheet_1.pdf [file DataSheet_1.pdf]

# Development and Validation of Ferroptosis- and Immune-related lncRNAs Signatures for Breast Infiltrating Duct and Lobular Carcinoma

Tao Wei<sup>1#</sup>, Ning Zhu<sup>2#</sup>, Weihua Jiang<sup>3</sup>, Xiao-Liang Xing<sup>2</sup>

<sup>1</sup>Urumqi Friendship Hospital, Urumqi 830000, Xinjiang, China.

<sup>2</sup>School of Public Health and Laboratory Medicine, Hunan University of Medicine, Huaihua 418000, Hunan, P. R. China.

<sup>3</sup>The Affiliated Tumor Hospital of Xinjiang Medical University, Urumqi 830000, Xinjiang, China.

#Contributed equally to this work.

\*Correspondence: Xiao-Liang Xing, xiaoliangxinghnm@126.com.

**Supplementary:** 4 figures and 2 tables

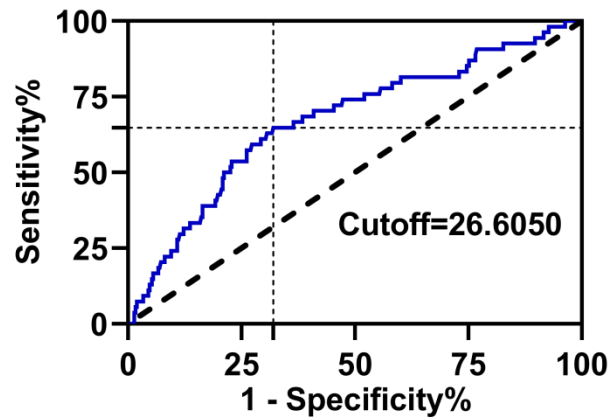

**Supplementary Figure 1** The Youden index as the optimal cut-off value

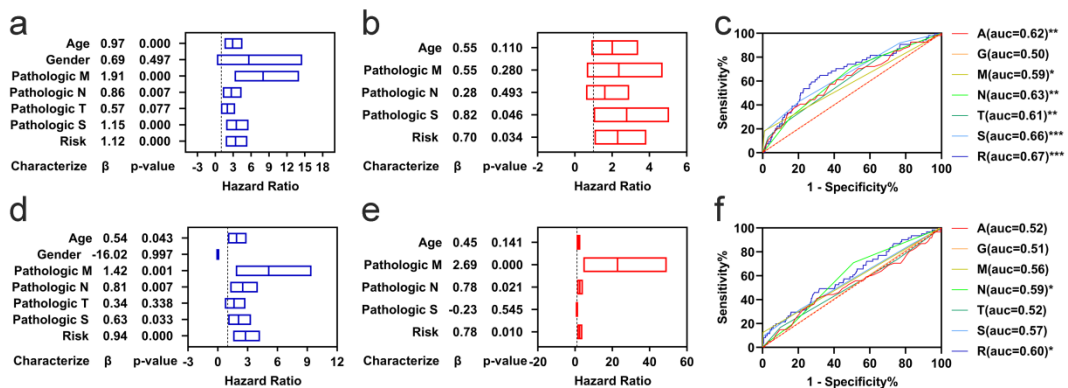

**Supplementary Figure 2** Independent prognostic values of those 4 FI-DELS in training group and validation group.

**a, d**, Univariate Cox regression analyses illustrated four clinical characteristics and risk assessment model were correlated with OS of patients. **a**, for training group. **d**, for validation group. **b, e**, Multivariate Cox regression analyses illustrated three clinical characteristics and risk assessment model were correlated with the OS of patients independently. **b**, for training group. **c**, for validation group. **c, f** ROC curve of different clinical characteristics and risk assessment model. **c**, for training group. **f**, for validation group.

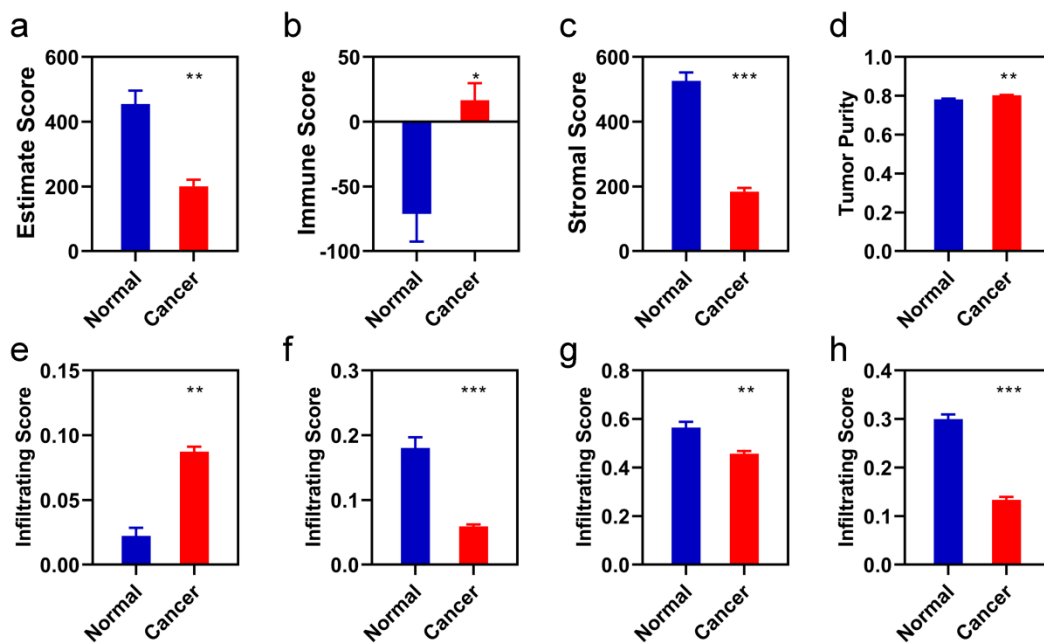

**Supplementary Figure 3** Correlation analyses of risk assessment model with the immunity.

**a-d**, Comparison of the estimate score (a), immune score (b), stromal score (c), and tumor purity (d) between normal and cancer. **e-h**, Comparison of the infiltrating score between normal and cancer. **e**, B cell. **f**, Macrophage. **g**, Myeloid dendritic cell. **h**, T cell CD8<sup>+</sup>. \*  $p < 0.05$ , \*\*  $p < 0.01$ , \*\*\*  $p < 0.001$ .

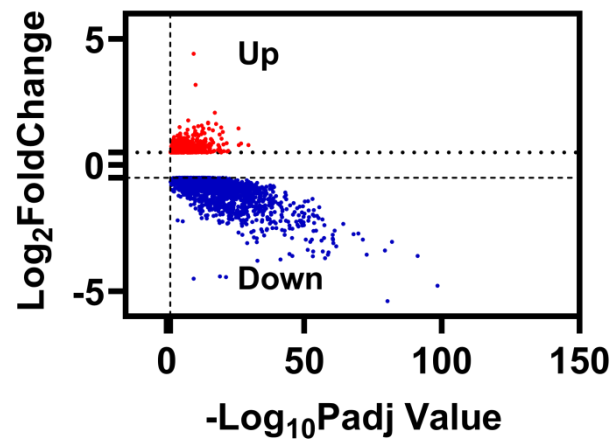

**Supplementary Figure 4** Volcano plot of DEGs between the patients with different risk score.

**Supplementary table 1** Significantly enriched GO term

| Term       | Count                                                            | FDR    |        |
|------------|------------------------------------------------------------------|--------|--------|
| BP         | immune response                                                  | 192    | 0.0000 |
|            | regulation of immune response                                    | 89     | 0.0000 |
|            | complement activation, classical pathway                         | 65     | 0.0000 |
|            | complement activation                                            | 58     | 0.0000 |
|            | inflammatory response                                            | 119    | 0.0000 |
|            | receptor-mediated endocytosis                                    | 76     | 0.0000 |
|            | Fc-gamma receptor signaling pathway involved in phagocytosis     | 58     | 0.0000 |
|            | adaptive immune response                                         | 59     | 0.0000 |
|            | B cell receptor signaling pathway                                | 34     | 0.0000 |
|            | innate immune response                                           | 109    | 0.0000 |
|            | T cell costimulation                                             | 38     | 0.0000 |
|            | positive regulation of T cell proliferation                      | 33     | 0.0000 |
|            | cell adhesion                                                    | 113    | 0.0000 |
|            | cell surface receptor signaling pathway                          | 78     | 0.0000 |
|            | signal transduction                                              | 218    | 0.0000 |
|            | Fc-epsilon receptor signaling pathway                            | 58     | 0.0000 |
|            | transmembrane receptor protein tyrosine kinase signaling pathway | 40     | 0.0000 |
|            | proteolysis                                                      | 115    | 0.0000 |
|            | response to lipopolysaccharide                                   | 54     | 0.0000 |
|            | phagocytosis, recognition                                        | 19     | 0.0000 |
| chemotaxis | 42                                                               | 0.0000 |        |

|                                                                                           |    |        |
|-------------------------------------------------------------------------------------------|----|--------|
| positive regulation of ERK1 and ERK2 cascade                                              | 52 | 0.0000 |
| phagocytosis, engulfment                                                                  | 20 | 0.0000 |
| chemokine-mediated signaling pathway                                                      | 29 | 0.0000 |
| positive regulation of B cell activation                                                  | 17 | 0.0000 |
| cell-cell signaling                                                                       | 64 | 0.0000 |
| positive regulation of gene expression                                                    | 63 | 0.0000 |
| cellular response to interleukin-1                                                        | 27 | 0.0000 |
| cellular response to tumor necrosis factor                                                | 35 | 0.0000 |
| T cell activation                                                                         | 21 | 0.0000 |
| T cell receptor signaling pathway                                                         | 41 | 0.0000 |
| leukocyte migration                                                                       | 36 | 0.0000 |
| positive regulation of inflammatory response                                              | 26 | 0.0000 |
| antigen processing and presentation of peptide or polysaccharide antigen via MHC class II | 12 | 0.0000 |
| positive regulation of protein kinase B signaling                                         | 28 | 0.0001 |
| cell chemotaxis                                                                           | 24 | 0.0001 |
| positive regulation of cell proliferation                                                 | 91 | 0.0001 |
| cellular response to interferon-gamma                                                     | 22 | 0.0001 |
| extracellular matrix organization                                                         | 48 | 0.0001 |
| cellular response to retinoic acid                                                        | 24 | 0.0002 |
| cellular response to lipopolysaccharide                                                   | 32 | 0.0003 |
| regulation of cell proliferation                                                          | 44 | 0.0006 |
| neutrophil chemotaxis                                                                     | 22 | 0.0011 |
| negative regulation of immune response                                                    | 9  | 0.0012 |
| central nervous system development                                                        | 32 | 0.0012 |
| T cell differentiation                                                                    | 14 | 0.0012 |
| peptidyl-tyrosine autophosphorylation                                                     | 16 | 0.0021 |
| peptidyl-tyrosine phosphorylation                                                         | 37 | 0.0022 |
| positive regulation of interleukin-4 production                                           | 11 | 0.0026 |
| negative regulation of interferon-gamma production                                        | 13 | 0.0028 |
| angiogenesis                                                                              | 48 | 0.0028 |
| interferon-gamma-mediated signaling pathway                                               | 22 | 0.0032 |
| negative regulation of T cell proliferation                                               | 15 | 0.0032 |
| estrous cycle                                                                             | 10 | 0.0034 |
| dendritic cell chemotaxis                                                                 | 10 | 0.0034 |
| positive regulation of cytosolic calcium ion concentration                                | 33 | 0.0039 |
| phosphatidylinositol phosphorylation                                                      | 26 | 0.0039 |
| cellular defense response                                                                 | 20 | 0.0039 |
| humoral immune response                                                                   | 19 | 0.0039 |
| positive regulation of cell migration                                                     | 41 | 0.0044 |
| T cell chemotaxis                                                                         | 7  | 0.0045 |
| MAPK cascade                                                                              | 53 | 0.0049 |
| skeletal system development                                                               | 33 | 0.0055 |

|                                                                             |     |        |
|-----------------------------------------------------------------------------|-----|--------|
| positive regulation of phosphatidylinositol 3-kinase signaling              | 20  | 0.0072 |
| positive regulation of smooth muscle cell proliferation                     | 19  | 0.0073 |
| positive regulation of epithelial cell proliferation                        | 19  | 0.0073 |
| positive regulation of transcription from RNA polymerase II promoter        | 152 | 0.0075 |
| regulation of cell shape                                                    | 33  | 0.0078 |
| hair follicle morphogenesis                                                 | 12  | 0.0078 |
| myeloid dendritic cell differentiation                                      | 10  | 0.0082 |
| positive regulation of interferon-gamma production                          | 16  | 0.0090 |
| positive regulation of interleukin-2 biosynthetic process                   | 8   | 0.0090 |
| brown fat cell differentiation                                              | 13  | 0.0093 |
| phosphatidylinositol-mediated signaling                                     | 27  | 0.0094 |
| regulation of phosphatidylinositol 3-kinase signaling                       | 22  | 0.0099 |
| monocyte chemotaxis                                                         | 15  | 0.0109 |
| negative regulation of Wnt signaling pathway                                | 17  | 0.0109 |
| positive regulation of monocyte chemotaxis                                  | 9   | 0.0112 |
| negative regulation of apoptotic process                                    | 79  | 0.0129 |
| defense response to bacterium                                               | 33  | 0.0134 |
| platelet degranulation                                                      | 26  | 0.0136 |
| skeletal muscle cell differentiation                                        | 16  | 0.0174 |
| negative regulation of cell proliferation                                   | 70  | 0.0174 |
| apoptotic signaling pathway                                                 | 20  | 0.0196 |
| immunological synapse formation                                             | 7   | 0.0198 |
| negative regulation of B cell activation                                    | 6   | 0.0207 |
| hyaluronan biosynthetic process                                             | 6   | 0.0207 |
| heterophilic cell-cell adhesion via plasma membrane cell adhesion molecules | 16  | 0.0207 |
| cell recognition                                                            | 10  | 0.0251 |
| glial cell differentiation                                                  | 8   | 0.0254 |
| response to cold                                                            | 13  | 0.0266 |
| platelet activation                                                         | 27  | 0.0299 |
| response to wounding                                                        | 18  | 0.0324 |
| negative thymic T cell selection                                            | 7   | 0.0348 |
| negative regulation of T cell activation                                    | 7   | 0.0348 |
| regulation of cytokine secretion                                            | 7   | 0.0348 |
| positive regulation of MAPK cascade                                         | 21  | 0.0373 |
| cellular calcium ion homeostasis                                            | 23  | 0.0384 |
| lymphocyte chemotaxis                                                       | 11  | 0.0391 |
| cellular response to organic cyclic compound                                | 17  | 0.0408 |
| tumor necrosis factor-mediated signaling pathway                            | 27  | 0.0408 |
| ureteric bud development                                                    | 13  | 0.0408 |
| negative regulation of tumor necrosis factor production                     | 13  | 0.0408 |

|                                                                      |                                                            |        |        |
|----------------------------------------------------------------------|------------------------------------------------------------|--------|--------|
|                                                                      | cGMP-mediated signaling                                    | 6      | 0.0420 |
|                                                                      | single organismal cell-cell adhesion                       | 24     | 0.0482 |
| CC                                                                   | plasma membrane                                            | 721    | 0.0000 |
|                                                                      | extracellular region                                       | 358    | 0.0000 |
|                                                                      | external side of plasma membrane                           | 100    | 0.0000 |
|                                                                      | integral component of plasma membrane                      | 306    | 0.0000 |
|                                                                      | extracellular space                                        | 290    | 0.0000 |
|                                                                      | blood microparticle                                        | 54     | 0.0000 |
|                                                                      | cell surface                                               | 123    | 0.0000 |
|                                                                      | integral component of membrane                             | 723    | 0.0000 |
|                                                                      | proteinaceous extracellular matrix                         | 70     | 0.0000 |
|                                                                      | membrane raft                                              | 57     | 0.0000 |
|                                                                      | extracellular exosome                                      | 416    | 0.0000 |
|                                                                      | immunoglobulin complex, circulating                        | 13     | 0.0000 |
|                                                                      | extrinsic component of cytoplasmic side of plasma membrane | 25     | 0.0000 |
|                                                                      | T cell receptor complex                                    | 12     | 0.0000 |
|                                                                      | endocytic vesicle membrane                                 | 23     | 0.0001 |
|                                                                      | MHC class II protein complex                               | 12     | 0.0003 |
|                                                                      | immunological synapse                                      | 15     | 0.0003 |
|                                                                      | receptor complex                                           | 33     | 0.0003 |
|                                                                      | mast cell granule                                          | 11     | 0.0012 |
|                                                                      | apical plasma membrane                                     | 57     | 0.0015 |
|                                                                      | anchored component of membrane                             | 28     | 0.0036 |
|                                                                      | transport vesicle membrane                                 | 14     | 0.0048 |
|                                                                      | collagen trimer                                            | 24     | 0.0049 |
| sarcolemma                                                           | 22                                                         | 0.0105 |        |
| ruffle membrane                                                      | 21                                                         | 0.0164 |        |
| extrinsic component of external side of plasma membrane              | 6                                                          | 0.0182 |        |
| integral component of luminal side of endoplasmic reticulum membrane | 11                                                         | 0.0203 |        |
| neuron projection                                                    | 44                                                         | 0.0266 |        |
| caveola                                                              | 17                                                         | 0.0424 |        |
| MF                                                                   | antigen binding                                            | 64     | 0.0000 |
|                                                                      | serine-type endopeptidase activity                         | 92     | 0.0000 |
|                                                                      | receptor activity                                          | 63     | 0.0000 |
|                                                                      | immunoglobulin receptor binding                            | 19     | 0.0000 |
|                                                                      | receptor binding                                           | 81     | 0.0000 |
|                                                                      | heparin binding                                            | 45     | 0.0000 |
|                                                                      | Ras guanyl-nucleotide exchange factor activity             | 35     | 0.0000 |
|                                                                      | phosphatidylinositol-4,5-bisphosphate 3-kinase activity    | 24     | 0.0000 |
|                                                                      | transmembrane signaling receptor activity                  | 51     | 0.0001 |
|                                                                      | MHC class II receptor activity                             | 11     | 0.0001 |

|                                                                                                               |     |        |
|---------------------------------------------------------------------------------------------------------------|-----|--------|
| chemokine activity                                                                                            | 20  | 0.0001 |
| calcium ion binding                                                                                           | 124 | 0.0001 |
| extracellular matrix structural constituent                                                                   | 22  | 0.0009 |
| cytokine activity                                                                                             | 40  | 0.0025 |
| cell adhesion molecule binding                                                                                | 20  | 0.0030 |
| transcriptional activator activity, RNA polymerase II core promoter proximal region sequence-specific binding | 49  | 0.0030 |
| calcium-dependent phospholipid binding                                                                        | 19  | 0.0036 |
| lipopeptide binding                                                                                           | 7   | 0.0037 |
| ATPase activity, coupled to transmembrane movement of substances                                              | 16  | 0.0041 |
| protein tyrosine kinase activity                                                                              | 32  | 0.0043 |
| Wnt-protein binding                                                                                           | 13  | 0.0050 |
| non-membrane spanning protein tyrosine kinase activity                                                        | 16  | 0.0064 |
| transmembrane receptor protein tyrosine kinase activity                                                       | 14  | 0.0102 |
| integrin binding                                                                                              | 26  | 0.0125 |
| SH3/SH2 adaptor activity                                                                                      | 17  | 0.0187 |
| carbohydrate binding                                                                                          | 39  | 0.0312 |
| virus receptor activity                                                                                       | 19  | 0.0312 |
| drug binding                                                                                                  | 20  | 0.0313 |
| glucose transmembrane transporter activity                                                                    | 8   | 0.0323 |
| tumor necrosis factor-activated receptor activity                                                             | 10  | 0.0372 |
| transcription regulatory region DNA binding                                                                   | 41  | 0.0372 |

### Supplementary table 2 Significantly enriched KEGG

| Term                                                  | Count | FDR    |
|-------------------------------------------------------|-------|--------|
| hsa04060:Cytokine-cytokine receptor interaction       | 82    | 0.0000 |
| hsa04514:Cell adhesion molecules (CAMs)               | 58    | 0.0000 |
| hsa04640:Hematopoietic cell lineage                   | 39    | 0.0000 |
| hsa05332:Graft-versus-host disease                    | 22    | 0.0000 |
| hsa04672:Intestinal immune network for IgA production | 25    | 0.0000 |
| hsa05330:Allograft rejection                          | 22    | 0.0000 |
| hsa04940:Type I diabetes mellitus                     | 23    | 0.0000 |
| hsa05144:Malaria                                      | 24    | 0.0000 |
| hsa05323:Rheumatoid arthritis                         | 33    | 0.0000 |
| hsa05166:HTLV-I infection                             | 65    | 0.0000 |
| hsa05340:Primary immunodeficiency                     | 19    | 0.0000 |
| hsa04062:Chemokine signaling pathway                  | 52    | 0.0000 |
| hsa05416:Viral myocarditis                            | 25    | 0.0000 |
| hsa04668:TNF signaling pathway                        | 36    | 0.0000 |
| hsa05150:Staphylococcus aureus infection              | 24    | 0.0000 |
| hsa05321:Inflammatory bowel disease (IBD)             | 26    | 0.0000 |

|                                                                 |    |        |
|-----------------------------------------------------------------|----|--------|
| hsa04380:Osteoclast differentiation                             | 39 | 0.0000 |
| hsa05320:Autoimmune thyroid disease                             | 22 | 0.0000 |
| hsa04151:PI3K-Akt signaling pathway                             | 73 | 0.0000 |
| hsa04064:NF-kappa B signaling pathway                           | 28 | 0.0000 |
| hsa05310:Asthma                                                 | 15 | 0.0000 |
| hsa04024:cAMP signaling pathway                                 | 48 | 0.0000 |
| hsa04660:T cell receptor signaling pathway                      | 30 | 0.0000 |
| hsa04510:Focal adhesion                                         | 49 | 0.0000 |
| hsa05146:Amoebiasis                                             | 31 | 0.0000 |
| hsa05200:Pathways in cancer                                     | 79 | 0.0000 |
| hsa05142:Chagas disease (American trypanosomiasis)              | 30 | 0.0001 |
| hsa05143:African trypanosomiasis                                | 15 | 0.0001 |
| hsa04512:ECM-receptor interaction                               | 26 | 0.0002 |
| hsa04020:Calcium signaling pathway                              | 42 | 0.0002 |
| hsa04145:Phagosome                                              | 37 | 0.0002 |
| hsa05140:Leishmaniasis                                          | 22 | 0.0004 |
| hsa05145:Toxoplasmosis                                          | 29 | 0.0005 |
| hsa04630:Jak-STAT signaling pathway                             | 35 | 0.0006 |
| hsa05169:Epstein-Barr virus infection                           | 31 | 0.0006 |
| hsa04014:Ras signaling pathway                                  | 48 | 0.0007 |
| hsa04662:B cell receptor signaling pathway                      | 21 | 0.0007 |
| hsa03320:PPAR signaling pathway                                 | 20 | 0.0014 |
| hsa05414:Dilated cardiomyopathy                                 | 23 | 0.0016 |
| hsa04610:Complement and coagulation cascades                    | 20 | 0.0020 |
| hsa02010:ABC transporters                                       | 15 | 0.0022 |
| hsa05205:Proteoglycans in cancer                                | 42 | 0.0022 |
| hsa05162:Measles                                                | 31 | 0.0023 |
| hsa04612:Antigen processing and presentation                    | 21 | 0.0024 |
| hsa04650:Natural killer cell mediated cytotoxicity              | 29 | 0.0025 |
| hsa05152:Tuberculosis                                           | 38 | 0.0025 |
| hsa04974:Protein digestion and absorption                       | 23 | 0.0026 |
| hsa04725:Cholinergic synapse                                    | 27 | 0.0026 |
| hsa04923:Regulation of lipolysis in adipocytes                  | 17 | 0.0029 |
| hsa05410:Hypertrophic cardiomyopathy (HCM)                      | 21 | 0.0030 |
| hsa04713:Circadian entrainment                                  | 24 | 0.0030 |
| hsa04920:Adipocytokine signaling pathway                        | 19 | 0.0050 |
| hsa05020:Prion diseases                                         | 12 | 0.0057 |
| hsa04921:Oxytocin signaling pathway                             | 32 | 0.0069 |
| hsa05412:Arrhythmogenic right ventricular cardiomyopathy (ARVC) | 18 | 0.0074 |
| hsa04621:NOD-like receptor signaling pathway                    | 16 | 0.0074 |
| hsa04664:Fc epsilon RI signaling pathway                        | 18 | 0.0085 |
| hsa05164:Influenza A                                            | 35 | 0.0106 |



|                                                    |    |        |
|----------------------------------------------------|----|--------|
| hsa04611:Platelet activation                       | 28 | 0.0111 |
| hsa04911:Insulin secretion                         | 20 | 0.0174 |
| hsa05222:Small cell lung cancer                    | 20 | 0.0174 |
| hsa05202:Transcriptional misregulation in cancer   | 33 | 0.0174 |
| hsa04970:Salivary secretion                        | 20 | 0.0195 |
| hsa04015:Rap1 signaling pathway                    | 39 | 0.0217 |
| hsa05133:Pertussis                                 | 18 | 0.0217 |
| hsa04022:cGMP-PKG signaling pathway                | 31 | 0.0237 |
| hsa04924:Renin secretion                           | 16 | 0.0237 |
| hsa05214:Glioma                                    | 16 | 0.0271 |
| hsa04666:Fc gamma R-mediated phagocytosis          | 19 | 0.0299 |
| hsa00590:Arachidonic acid metabolism               | 15 | 0.0347 |
| hsa04310:Wnt signaling pathway                     | 27 | 0.0380 |
| hsa04261:Adrenergic signaling in cardiomyocytes    | 27 | 0.0380 |
| hsa05223:Non-small cell lung cancer                | 14 | 0.0380 |
| hsa04960:Aldosterone-regulated sodium reabsorption | 11 | 0.0392 |
| hsa04012:ErbB signaling pathway                    | 19 | 0.0392 |
| hsa04925:Aldosterone synthesis and secretion       | 18 | 0.0399 |
| hsa04080:Neuroactive ligand-receptor interaction   | 47 | 0.0410 |
| hsa04723:Retrograde endocannabinoid signaling      | 21 | 0.0430 |
| hsa04724:Glutamatergic synapse                     | 23 | 0.0430 |
| hsa04670:Leukocyte transendothelial migration      | 23 | 0.0466 |
| hsa04066:HIF-1 signaling pathway                   | 20 | 0.0483 |
| hsa05168:Herpes simplex infection                  | 33 | 0.0485 |
